# Supplementary material for: CBX8 Suppresses Tumor Metastasis via Repressing Snail in Esophageal Squamous Cell Carcinoma
Source: PubMed Central journal article supplement — Theranostics. 2017 Aug 15;7(14):3478–88. doi: 10.7150/thno.20717 (PMC5596437; doi:10.7150/thno.20717), 2017-08-15
Supplement: thnov07p3478s1.pdf [file thnov07p3478s1.pdf]

## Supplementary data

### Supplementary Figures

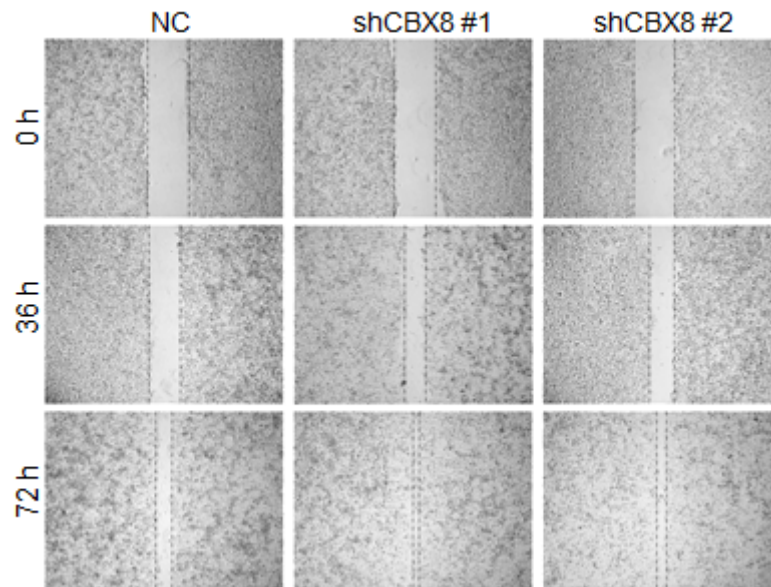

**Figure S1. The cell ability of wound gap closure is dramatically enhanced by knocking down CBX8.** Wound-healing assays were performed in TE-1 cells stably expressing NC or CBX8 shRNA . Black dashed lines denote the margins of the wound. Representative images (40 ×) were taken at 0 h, 36 h and 72 h after scratching. Three independent experiments were performed.

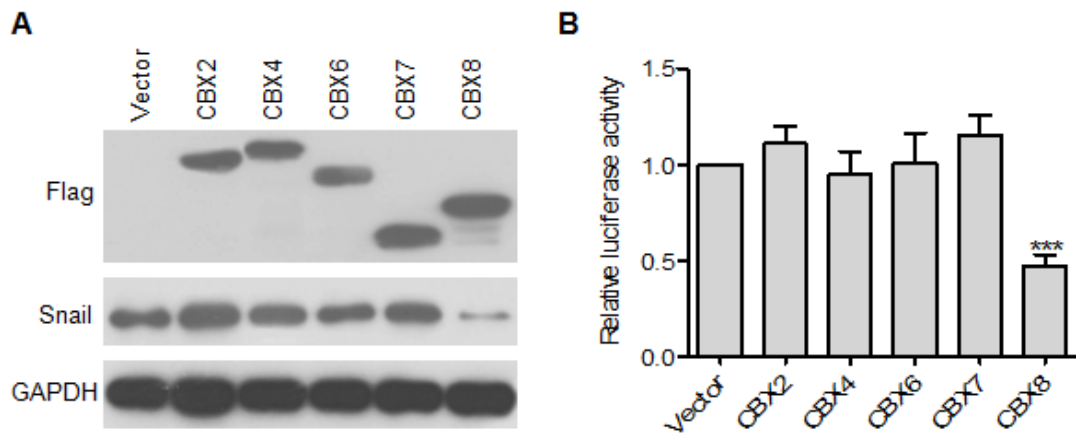

**Figure S2. CBX8, but not other members, impairs the expression of Snail.** (A)

HKESC1 cells were transfected with Vector or Flag-tagged CBXs for 36 h. Cell lysates were collected for Western blotting to detect Flag and Snail. GAPDH was used as the loading control. (B) Luciferase reporter assays were performed in HKESC1 cells co-transfected with Vector or Flag-tagged CBXs together with the luciferase gene driven by the Snail promoter sequences. The normalized luciferase activity in the Vector group was set as the relative luciferase activity. Each bar represents the mean  $\pm$  S.D. for triplicate experiments. \*\*\*  $p < 0.001$ , Student's t-test.

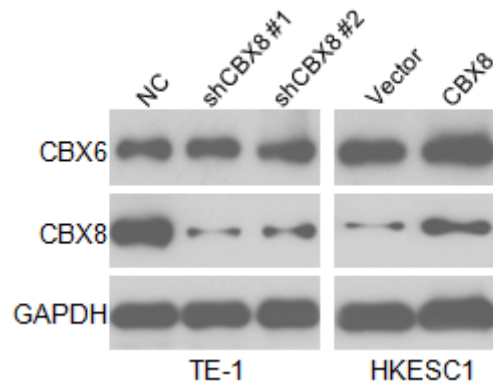

**Figure S3. Knockdown or overexpression of CBX8 doesn't affect the expression of CBX6 in the indicated cell lines.** The indicated proteins were determined by Western blotting in the indicated stable cell lines.

## Supplementary Tables

**Table S1. List of Primers for qRT-PCR**

| Genes       | Forward primers (5'-3') | Reverse primers (5'-3') |
|-------------|-------------------------|-------------------------|
| CBX8        | CCTTCGAAACATGGGTTTGT    | CTGGGCTTGTCATCCACTCT    |
| E-cadherin  | AATAGTGCCTAAAGTGCTGC    | AGACCCACCTCAATCATCCT    |
| N-cadherin  | AGCCAACCTTAACTGAGGAGT   | GGCAAGTTGATTGGAGGGATG   |
| Fibronectin | ATTTGCTCCTGCACATGCTT    | CGGGAATCTTCTCTGTCAGC    |

|          |                        |                         |
|----------|------------------------|-------------------------|
| Vimentin | GACGCCATCAACACCGAGTT   | CTTTGTCGTTGGTTAGCTGGT   |
| Snail    | ACTGCAACAAGGAATACCTCAG | GCACTGGTACTTCTTGACATCTG |
| Slug     | CGAACTGGACACACATACAGTG | CTGAGGATCTCTGGTTGTGGT   |
| GAPDH    | ACAGTCAGCCGCATCTTCTT   | GACAAGCTTCCCGTTCTCAG    |

**Table S2. The primers for qRT-PCR of ChIP assay**

| <b>Promoters</b> | <b>Forward primers (5'-3')</b> | <b>Reverse primers (5'-3')</b> |
|------------------|--------------------------------|--------------------------------|
| Snail-1          | TCTGAGGCCAAGGATCTCCA           | TGGCTTCGGATGTGCATCTT           |
| Snail-2          | GATGATGGGGTTCTGGCCTC           | CGTAGGACCCCCAGTTGAAG           |
| Snail-3          | GATCTGTCTGGGTGGTTGGG           | CCTCCTCTCCTTCCCCTCTT           |
| Snail-4          | CCAGGATCGAGTCACAGGATG          | ACTGGGGACCCACTTGCC             |
| Snail-5          | GAGTGGTTCTTCTGCGCTAC           | CTTCCGATTGGGGTTCGGAG           |
| Snail-6          | CGGAGACGAGCCTCCGATTG           | CCGCCAACTCCCTTAAGTACTCC        |
| Snail-7          | CGTCGGAAGGTCAGGTGTC            | GACGTCGAGCGAAGCGA              |
| Snail-8          | TGGATAAGGGAAGGAACGGG           | TGGAGAGCGTGGCATTGA             |
| Snail-9          | CCTGGAAGCTGCTCTCTAGG           | CAGTGAGGGAGACAGACGAA           |

|          |                       |                       |
|----------|-----------------------|-----------------------|
| Snail-10 | CACCCCACATGCATTCAGTC  | AGGGACCTGGTTAGAGTTTCG |
| Snail-11 | GGAGCTAAATTGACACGGGAC | ACCTATAAGCACCCACACC   |
| Snail-12 | AGAGACGTAGGGGAGAGGAG  | AGCCAAAGTCCTCTCCTCAG  |
| Snail-13 | CCTGGGATGCAGTTGGTTTG  | TTTCACGCCCATCAGAAGGA  |
| Snail-14 | TACAGGATTGCACCAGGGTT  | TAATTAGTCTGGGTGGGGCC  |
| Snail-15 | GGGCCTACTTTGGCTAGGG   | CTAGGCAGGGAGGGATCTTT  |
| Snail-16 | GAAGGAAAGTGGAAAGCGGG  | CTCCCCTTTAGCCTCCCAA   |
| p16      | GGCATCAGCAAAGTCTGAGC  | CTGGGAGACAAGAGCGAAAC  |
| GAPDH    | GGTAGGGAGTTCGAGACCAG  | TCAACGCAGTTCAGTTAGGC  |
